# Supplementary material for: Inhibition of CXCR4 by LY2624587, a Fully Humanized Anti-CXCR4 Antibody Induces Apoptosis of Hematologic Malignancies
Source: PubMed Central journal article supplement (PMC4782998; doi:10.1371/journal.pone.0150585), 2016-03-08

**A**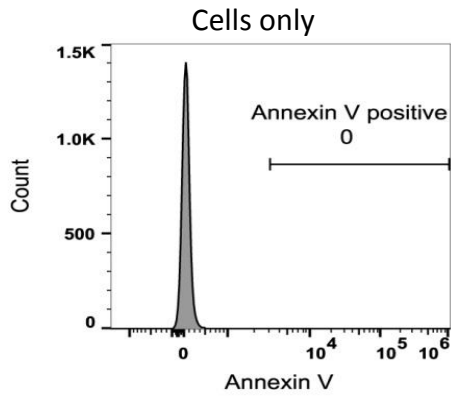**B**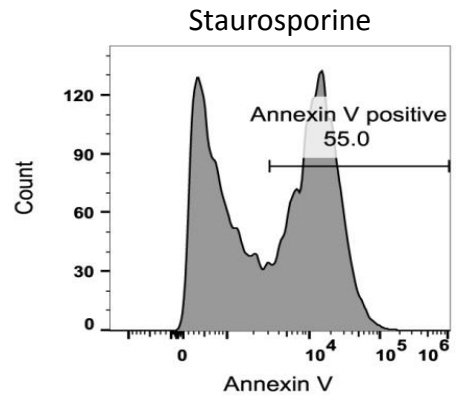**C**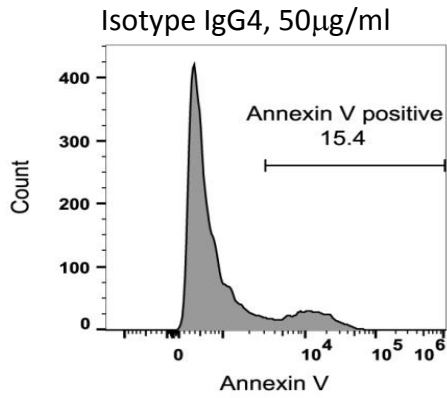**D**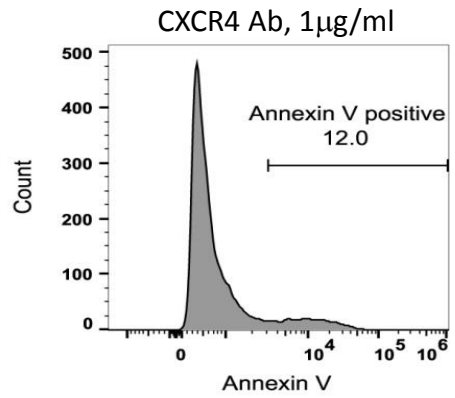**E**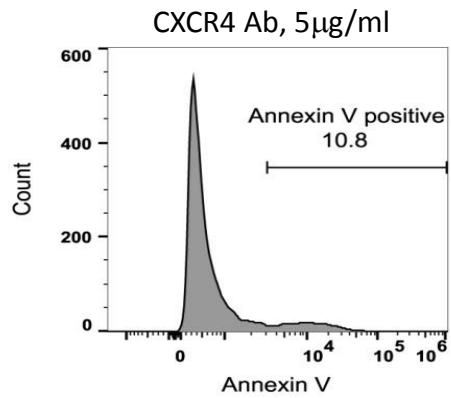**F**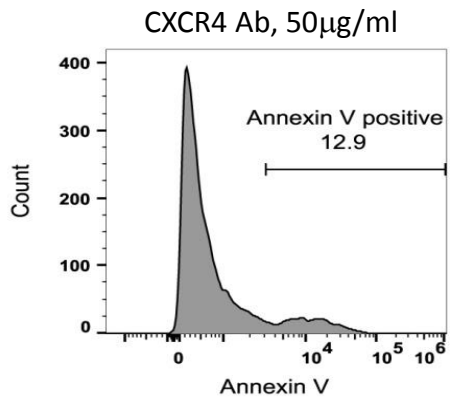

Supplement: pone.0150585.s001.pdf [file pone.0150585.s001.pdf]
